# Supplementary material
Source: PubMed Central journal article supplement (PMC2536825)
Supplement: 00033.2008_1.pdf [file 00033.2008_1.pdf]

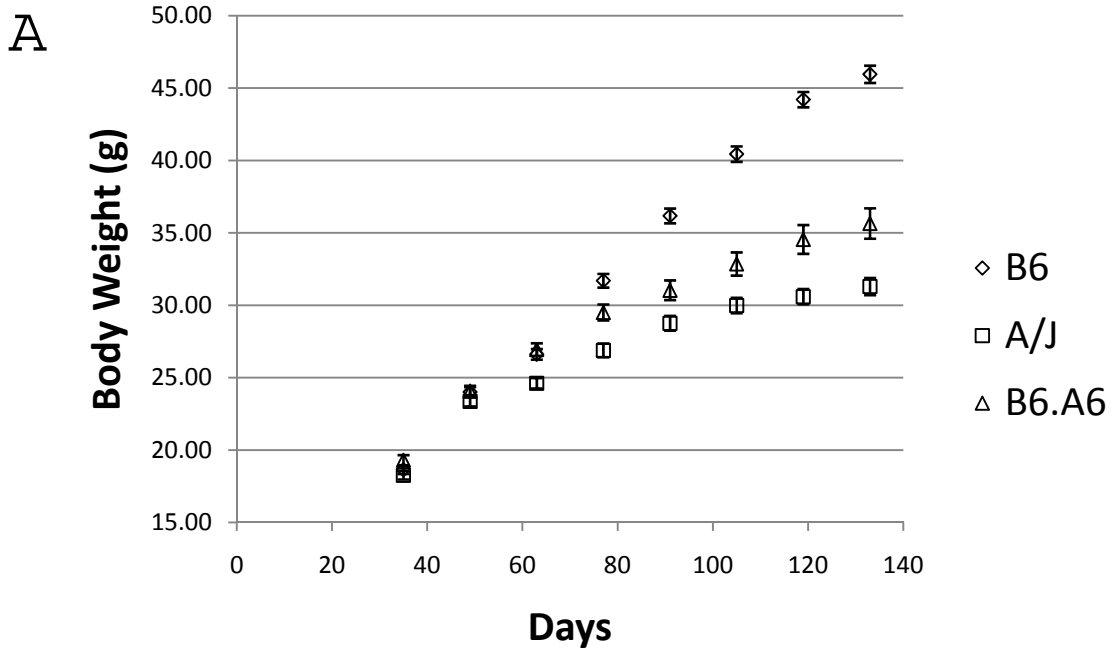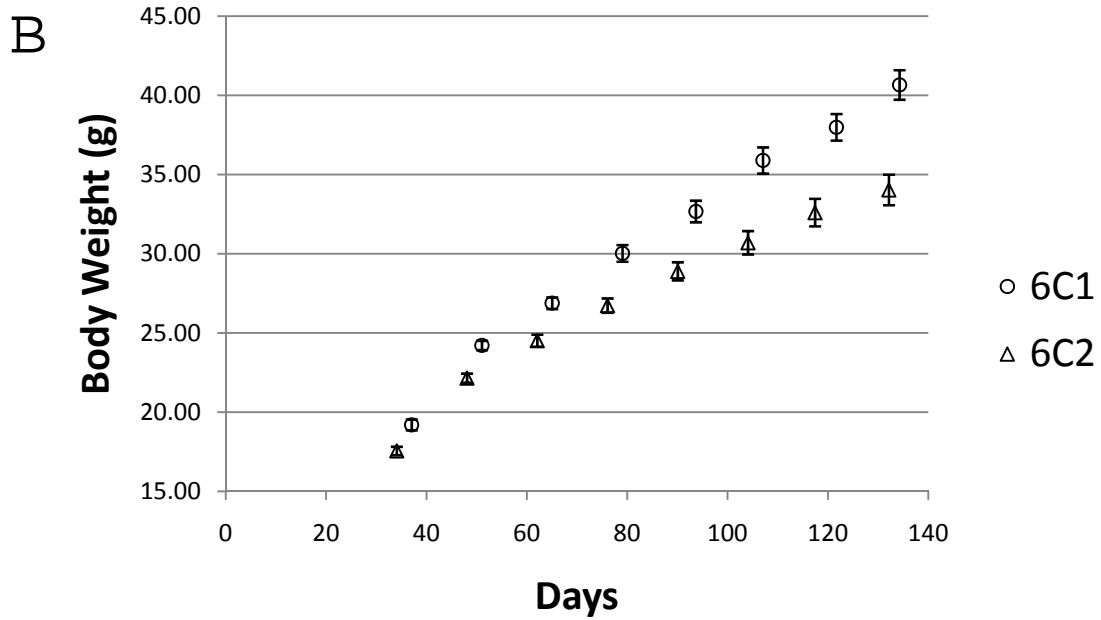

Supplemental Figure 1. Growth curves of mice fed the HFSC diet. (A) B6, A/J, and B6.A6 or (B) 6C1 and 6C2 mice were weighed every 2 weeks for 100 days beginning at 35 days of age.
